# Supplementary material for: Precision multiparameter tracking of inflammation on timescales of hours to years using serial dried blood spots
Source: PubMed Central journal article supplement (PMC7372997; doi:10.4155/bio-2019-0278), 2020-04-07
Supplement: bio-2019-0278-s4.pdf [file bio-2019-0278-s4.pdf]

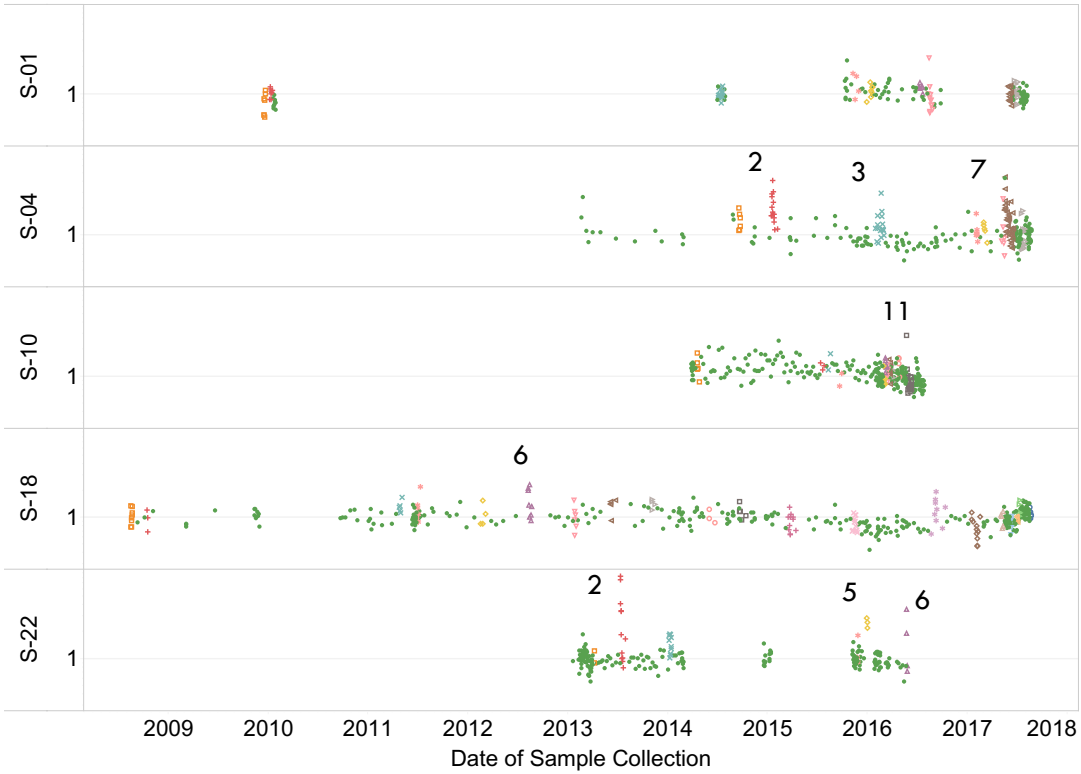

Supplementary Fig. 3
